# Supplementary material for: Manipulation of PK-M mutually exclusive alternative splicing by antisense oligonucleotides
Source: PubMed Central journal article supplement (PMC3498831; doi:10.1098/rsob.120133), 2012-10

Supplementary Figure 1

**a**

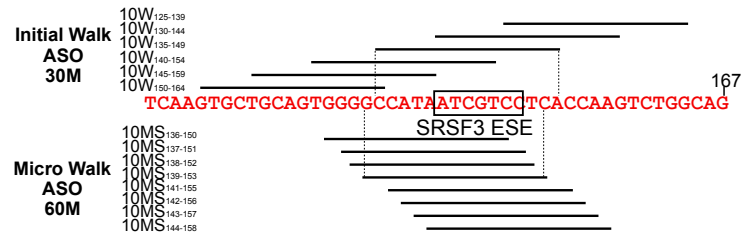

**b**

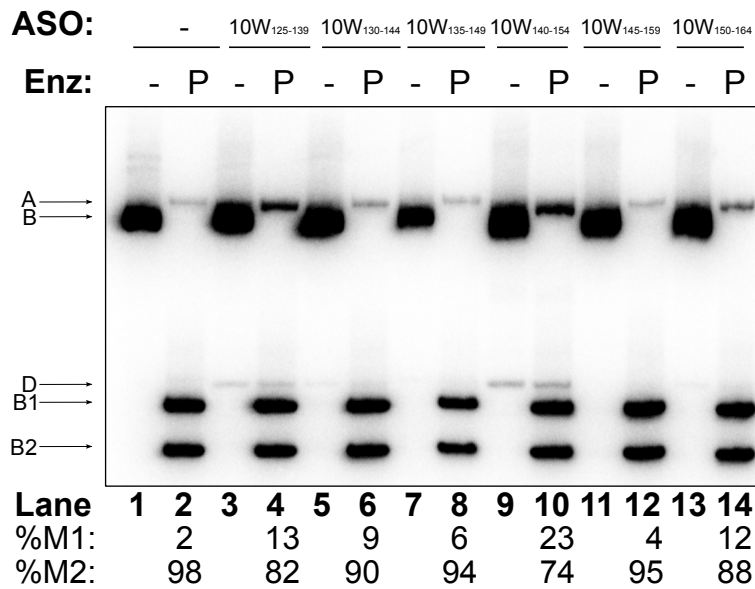

**c**

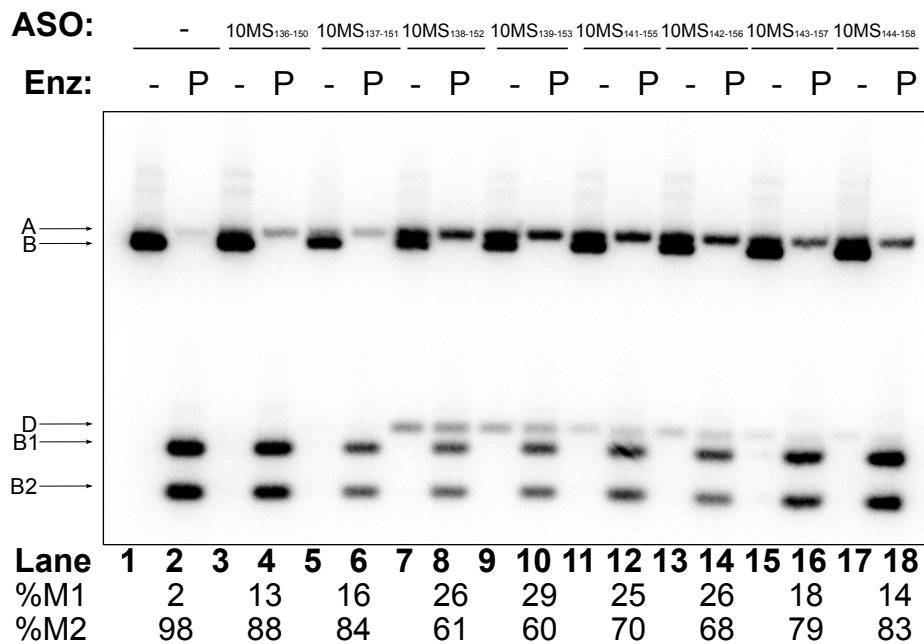

Supplement: rsob120133-s1.pdf [file rsob120133-s1.pdf]
