# Supplementary material for: Manipulation of PK-M mutually exclusive alternative splicing by antisense oligonucleotides
Source: PubMed Central journal article supplement (PMC3498831; doi:10.1098/rsob.120133), 2012-10

## Supplementary Figure 2

a

A172

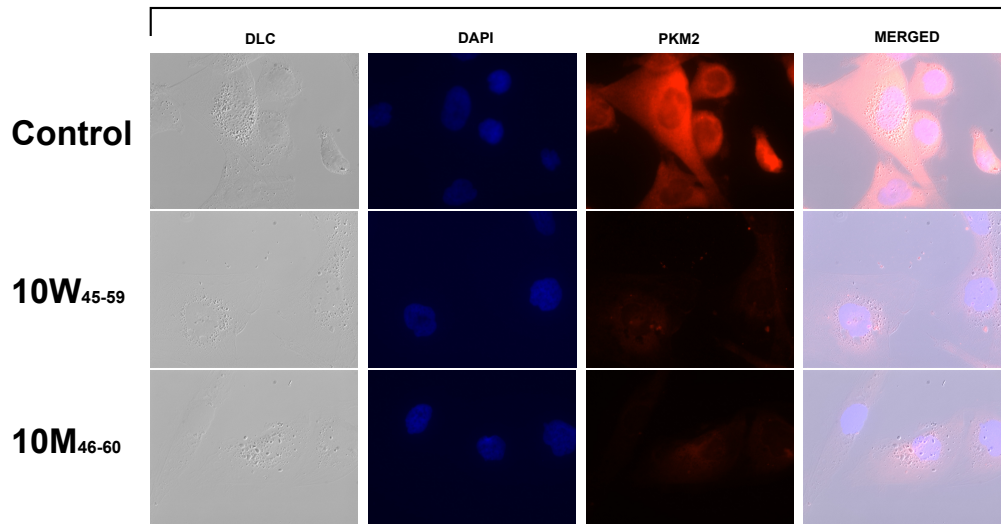

b

U87-MG

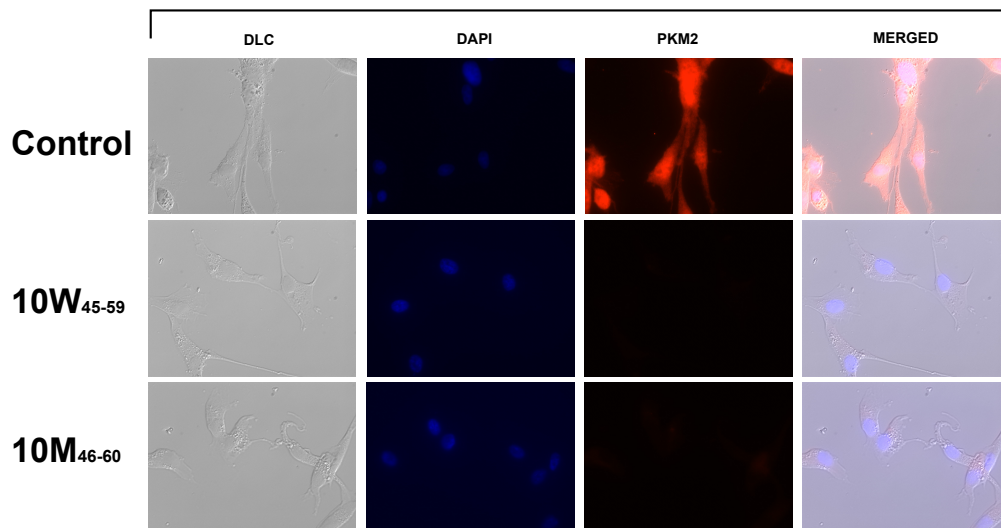

Supplement: rsob120133-s2.pdf [file rsob120133-s2.pdf]
