# Supplementary material for: Manipulation of PK-M mutually exclusive alternative splicing by antisense oligonucleotides
Source: PubMed Central journal article supplement (PMC3498831; doi:10.1098/rsob.120133), 2012-10

# Supplementary Fig 3

**a**

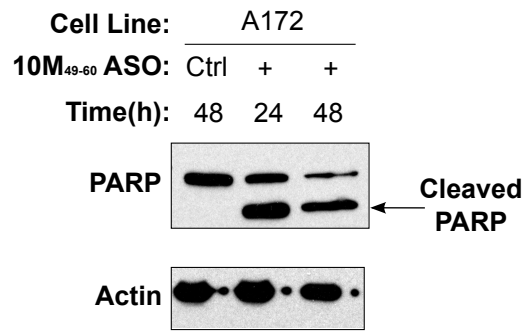

**b**

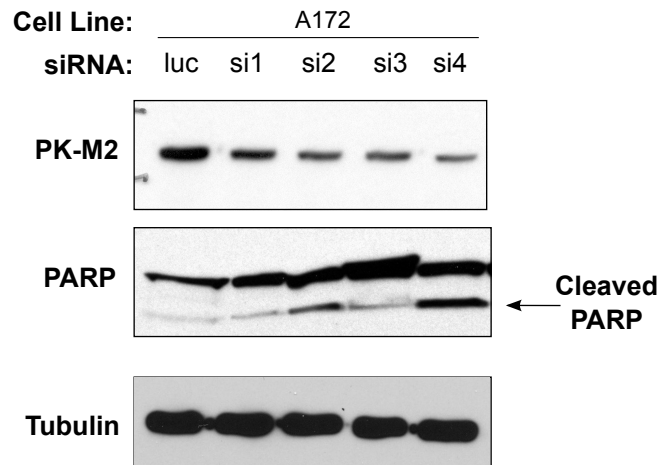

Supplement: rsob120133-s3.pdf [file rsob120133-s3.pdf]
